# Supplementary material for: CXCR5 induces perineural invasion of salivary adenoid cystic carcinoma by inhibiting microRNA-187
Source: publisher site journal article supplement (doi:10.18632/aging.203097), 2021-06-10
Supplement: Supplementary file [file aging-v13i11-203097-supplementary-material-SD1.pdf]

## SUPPLEMENTARY FIGURE

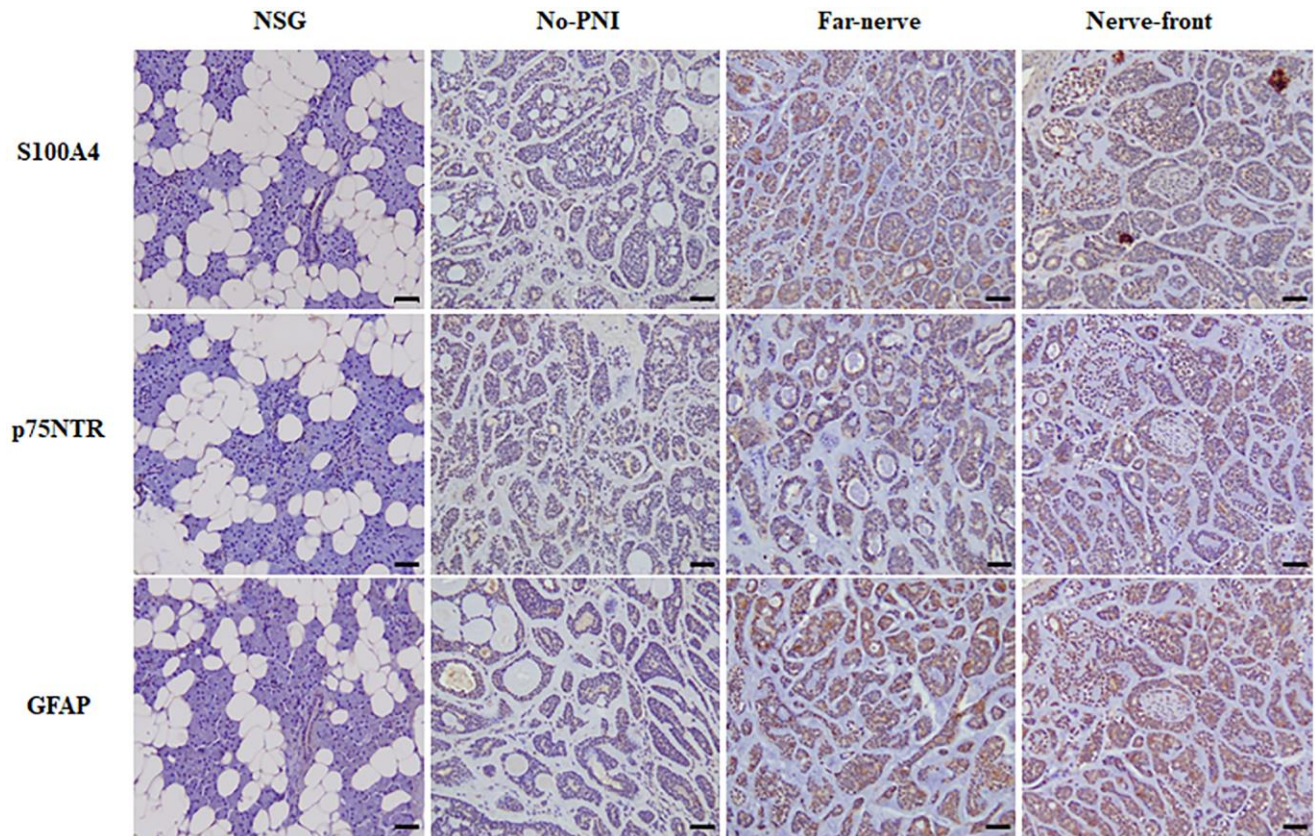

Supplementary Figure 1. Immunohistochemical staining of S100A4, p75NTR and GFAP in normal salivary gland (NSG), SACC without PNI (No-PNI), far away from nerve of SACC with PNI (Far-nerve), nerve invasion front of SACC with PNI (Nerve-front), (Bar: 50  $\mu$ m).
